# Supplementary material for: ND4L gene concurrent 10609T>C and 10663T>C mutations are associated with Leber's hereditary optic neuropathy in a large pedigree from Kuwait
Source: PubMed Central journal article supplement — Br J Ophthalmol. 2014 Feb 25;98(6):826–31. doi: 10.1136/bjophthalmol-2013-304140 (PMC4033154; doi:10.1136/bjophthalmol-2013-304140), 2014-02-25
Supplement: bjophthalmol-2013-304140-s1.pdf [file bjophthalmol-2013-304140-s1.pdf]

**Supplementary Table 1:**

| Fragment | change                   | samples                                                       |
|----------|--------------------------|---------------------------------------------------------------|
| 1        | A750G                    | V-1,V-2,V-7,V-9,V-14,VI-9,VI-10,VI-16,VI-17,VI-18,VI-19,VI-20 |
| 2        | T1438G                   | V-1,V-2,V-7,V-9,V-14,VI-9,VI-10,VI-16,VI-17,VI-18,VI-19,VI-20 |
| 2        | T1821C                   | V-1,V-2,V-7,V-9,VI-9,VI-10,VI-16,VI-17,VI-18,VI-19,VI-20      |
| 3        | A2355G                   | V-14                                                          |
| 3        | T2442C                   | V-14                                                          |
| 4        | A2706G                   | V-1,V-2,V-7,V-9,V-14,VI-9,VI-10,VI-16,VI-17,VI-18,VI-19,VI-20 |
| 5        | T3396C                   | V-1,V-2,V-7,V-9,VI-9,VI-10,VI-16,VI-17,VI-18,VI-19,VI-20      |
| 5        | T3847C                   | V-14                                                          |
| 6        | T4218C                   | V-1,V-2,V-7,V-9,VI-9,VI-10,VI-16,VI-17,VI-18,VI-19,VI-20      |
| 6        | G4541A<br>(heteroplasmy) | V-2, V-7,VI-19                                                |
| 7        | A4769G                   | V-1,V-2,V-7,V-9,V-14,VI-9,VI-10,VI-16,VI-17,VI-18,VI-19,VI-20 |
| 8        | C5601T                   | V-1,V-2,V-7,V-9,VI-9,VI-10,VI-16,VI-17,VI-18,VI-19,VI-20      |
| 9        | T4981C                   | V-14                                                          |
| 9        | G6366A                   | V-14                                                          |
| 10       | A6914G                   | V-14                                                          |
| 10       | C7028T                   | V-1,V-2,V-7,V-9,V-14,VI-9,VI-10,VI-16,VI-17,VI-18,VI-19,VI-20 |
| 11       | C7819A                   | V-1,V-2,V-7,V-9,VI-9,VI-10,VI-16,VI-17,VI-18,VI-19,VI-20      |
| 12       | A8527G                   | V-1,V-2,V-7,V-9,VI-9,VI-10,VI-16,VI-17,VI-18,VI-19,VI-20      |
| 13       | A8701G                   | V-1,V-2,V-7,V-9,VI-9,VI-10,VI-16,VI-17,VI-18,VI-19,VI-20      |
| 13       | A8860G                   | V-1,V-2,V-7,V-9,V-14,VI-9,VI-10,VI-16,VI-17,VI-18,VI-19,VI-20 |
| 13       | C8932T                   | V-1,V-2,V-7,V-9,VI-9,VI-10,VI-16,VI-17,VI-18,VI-19,VI-20      |
| 14       | T9539C                   | V-1,V-2,V-7,V-9,VI-9,VI-10,VI-16,VI-17,VI-18,VI-19,VI-20      |
| 14       | C9950T                   | V-1,V-2,V-7,V-9,VI-9,VI-10,VI-16,VI-17,VI-18,VI-19,VI-20      |
| 15       | A10398G                  | V-1,V-2,V-7,V-9,VI-9,VI-10,VI-16,VI-17,VI-18,VI-19,VI-20      |
| 15       | T10609C                  | V-1,V-2,V-7,V-9,VI-9,VI-10,VI-16,VI-17,VI-18,VI-19,VI-20      |
| 15       | T10663C                  | V-1,V-2,V-7,V-9,VI-9,VI-10,VI-16,VI-17,VI-18,VI-19,VI-20      |
| 16       | T10873C                  | V-1,V-2,V-7,V-9,VI-9,VI-10,VI-16,VI-17,VI-18,VI-19,VI-20      |
| 17       | G11440A                  | V-1,V-2,V-7,V-9,VI-9,VI-10,VI-16,VI-17,VI-18,VI-19,VI-20      |
| 17       | G11719A                  | V-1,V-2,V-7,V-9,VI-9,VI-10,VI-16,VI-17,VI-18,VI-19,VI-20      |
| 19       | C12705T                  | V-1,V-2,V-7,V-9,VI-9,VI-10,VI-16,VI-17,VI-18,VI-19,VI-20      |
| 19       | C13188T                  | V-14                                                          |
| 21       | G14769A                  | V-1,V-2,V-7,V-9,VI-9,VI-10,VI-16,VI-17,VI-18,VI-19,VI-20      |
| 22       | G15301A                  | V-1,V-2,V-7,V-9,VI-9,VI-10,VI-16,VI-17,VI-18,VI-19,VI-20      |
| 22       | A15326G                  | V-1,V-2,V-7,V-9,V-14,VI-9,VI-10,VI-16,VI-17,VI-18,VI-19,VI-20 |
| 22       | C15674T                  | V-14                                                          |
| 23       | 15944delT                | V-1,V-2,V-7,V-9,VI-9,VI-10,VI-16,VI-17,VI-18,VI-19,VI-20      |
| 23       | T16126C                  | V-14                                                          |
| 23       | C16209T                  | V-1,V-2,V-7,V-9,VI-9,VI-10,VI-16,VI-17,VI-18,VI-19,VI-20      |
| 23       | C16223T                  | V-1,V-2,V-7,V-9,VI-9,VI-10,VI-16,VI-17,VI-18,VI-19,VI-20      |
| 23       | C16292T                  | V-1,V-2,V-7,V-9,VI-9,VI-10,VI-16,VI-17,VI-18,VI-19,VI-20      |
| 23       | T16304C                  | V-14                                                          |
| 23       | T16311C                  | V-1,V-2,V-7,V-9,VI-9,VI-10,VI-16,VI-17,VI-18,VI-19,VI-20      |
| 23       | T16362C                  | V-14                                                          |
| 24       | T16519C                  | V-1,V-2,V-7,V-9,VI-9,VI-10,VI-16,VI-17,VI-18,VI-19,VI-20      |
| 24       | 58insC                   | V-14                                                          |
| 24       | C64T                     | V-14                                                          |
| 24       | A73G                     | V-1,V-2,V-7,V-9,VI-9,VI-10,VI-16,VI-17,VI-18,VI-19,VI-20      |
| 24       | A189G                    | V-1,V-2,V-7,V-9,VI-9,VI-10,VI-16,VI-17,VI-18,VI-19,VI-20      |
| 24       | A193G                    | V-1,V-2,V-7,V-9,VI-9,VI-10,VI-16,VI-17,VI-18,VI-19,VI-20      |

|    |         |                                                               |
|----|---------|---------------------------------------------------------------|
| 24 | A200G   | V-1,V-2,V-7,V-9,VI-9,VI-10,VI-16,VI-17,VI-18,VI-19,VI-20      |
| 24 | A263G   | V-1,V-2,V-7,V-9,V-14,VI-9,VI-10,VI-16,VI-17,VI-18,VI-19,VI-20 |
| 24 | 310insT | V-1,V-2,V-7,V-9,VI-9,VI-10,VI-16,VI-17,VI-18,VI-19,VI-20      |
